# Supplementary material for: Clinical implications of the blood urea nitrogen/creatinine ratio in heart failure and their association with haemoconcentration
Source: PubMed Central journal article supplement (PMC6989280; doi:10.1002/ehf2.12531), 2019-12-09

**Figure S1. The clinical implication of a high BUN/creatinine ratio at discharge may differ according to the response to decongestion therapy as indicated by the degree of hemoconcentration.**

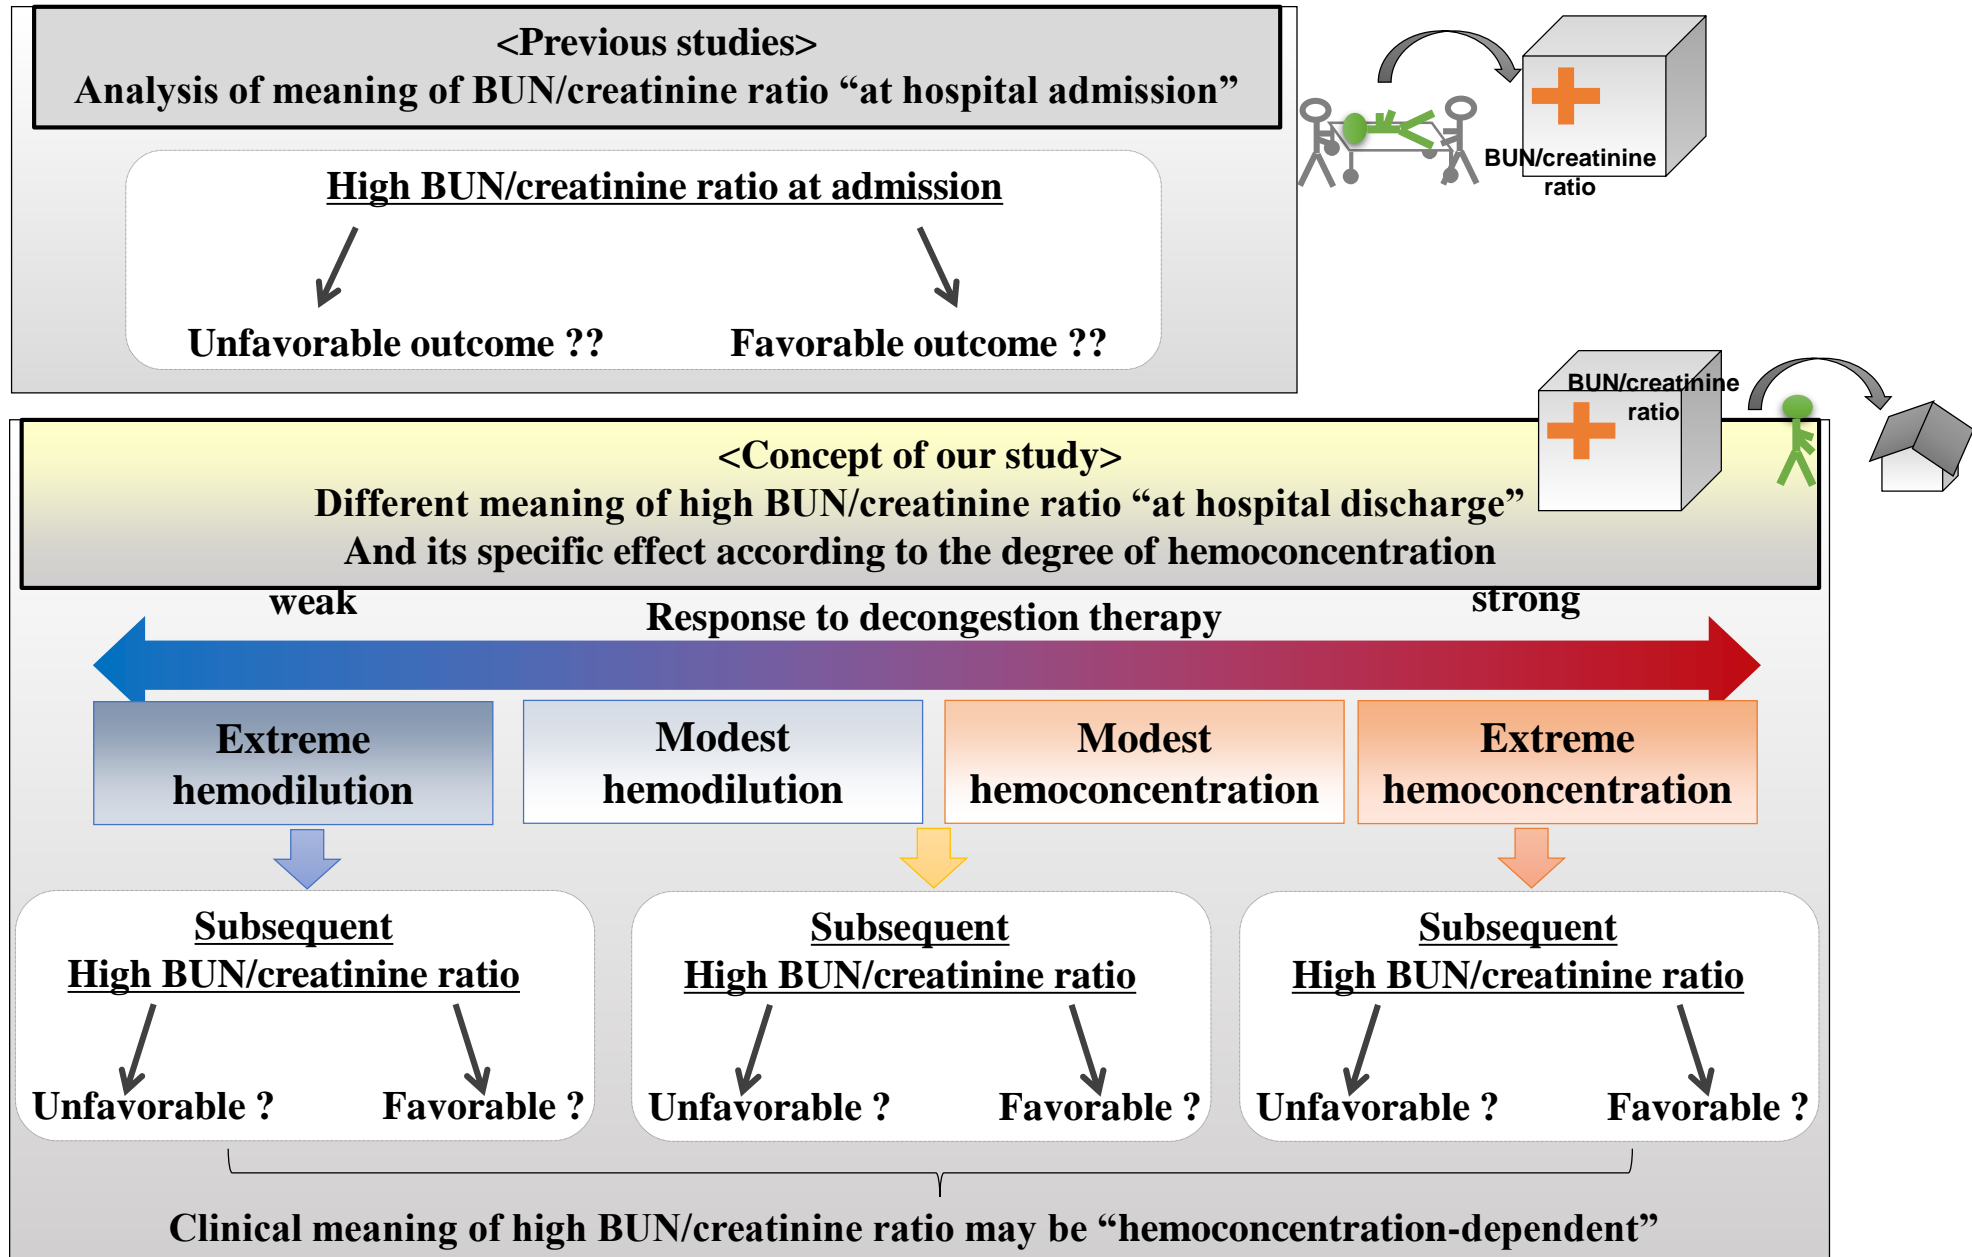

Supplement: EHF2-6-1274-s001.pdf [file EHF2-6-1274-s001.pdf]
