# Supplementary material for: Clinical implications of the blood urea nitrogen/creatinine ratio in heart failure and their association with haemoconcentration
Source: PubMed Central journal article supplement (PMC6989280; doi:10.1002/ehf2.12531), 2019-12-09

**Figure S2. Hazard ratio of high BUN/creatinine ratio in Hgb based subcategories**

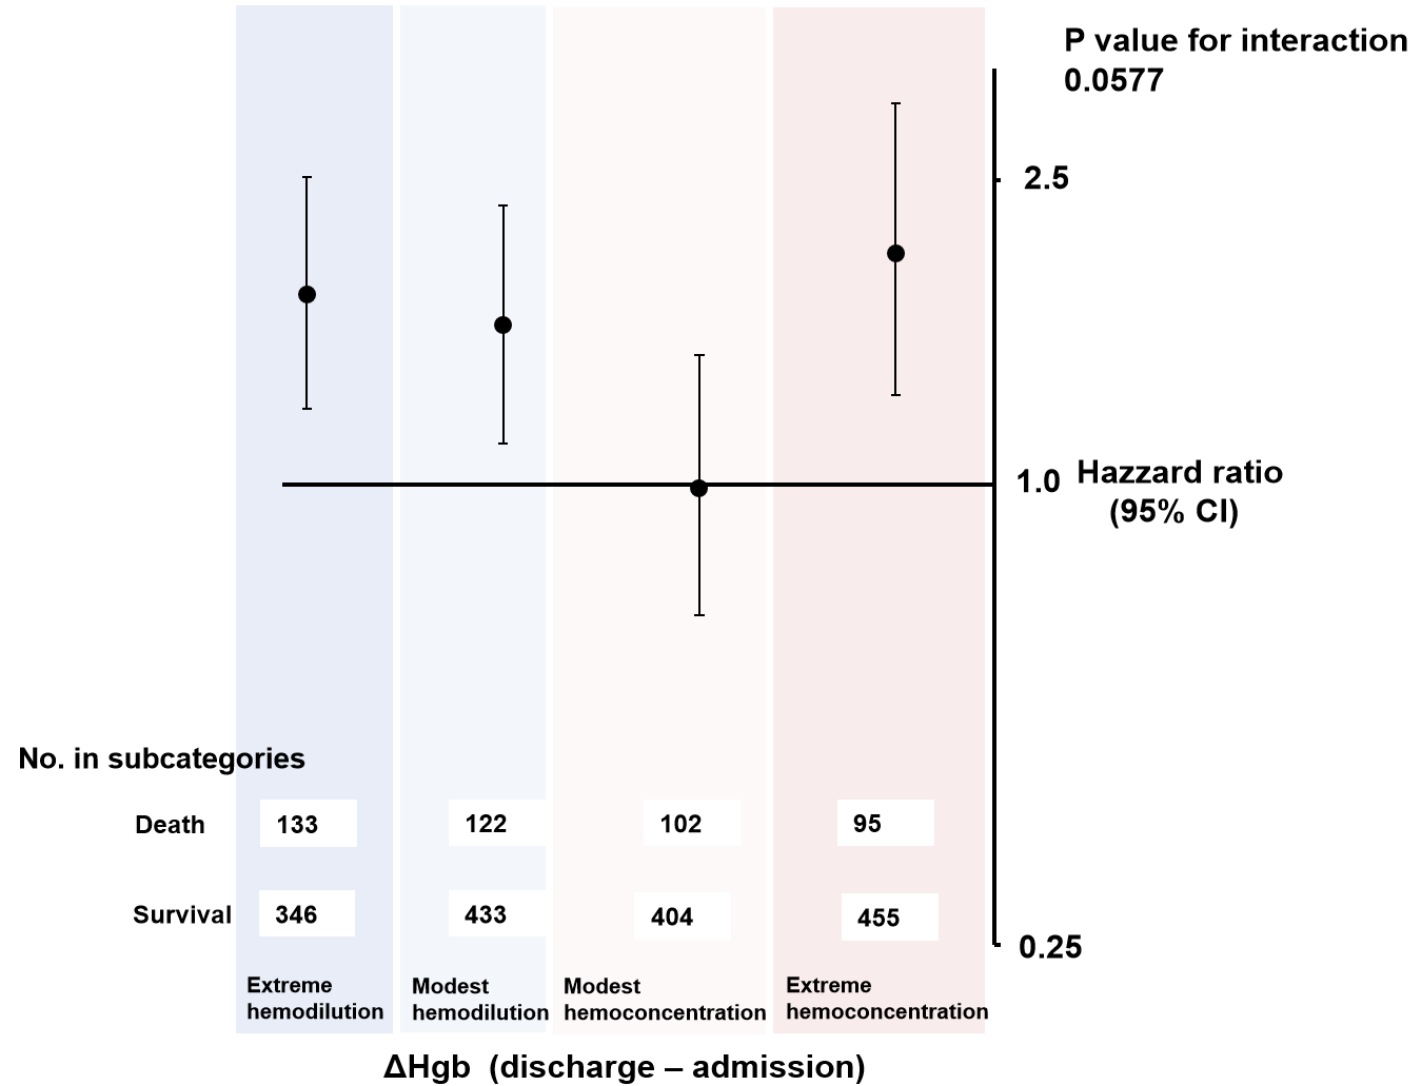

Supplement: EHF2-6-1274-s002.pdf [file EHF2-6-1274-s002.pdf]
