# Supplementary material for: Clinical implications of the blood urea nitrogen/creatinine ratio in heart failure and their association with haemoconcentration
Source: PubMed Central journal article supplement (PMC6989280; doi:10.1002/ehf2.12531), 2019-12-09
Supplement: EHF2-6-1274-s003.pdf [file EHF2-6-1274-s003.pdf]

**Table S1A** Baseline characteristics at admission in the total population and the four hemoglobin concentration from admission to discharge ( $\Delta$ Hgb)-based subcategories

|                                         | Total<br>(n = 2090) | Extreme<br>hemodilution<br>(n = 479) | Modest<br>hemodilution<br>(n = 555) | Modest<br>hemoconcentration<br>(n = 506) | Extreme<br>hemoconcentration<br>(n = 550) | p value<br>(between<br>groups) |
|-----------------------------------------|---------------------|--------------------------------------|-------------------------------------|------------------------------------------|-------------------------------------------|--------------------------------|
| Age, years <sup>†, ‡, §,   , #</sup>    | 76.0 (65.0–83.0)    | 75.0 (63.0–83.0)                     | 76.0 (67.0–84.0)                    | 77.0 (67.0–83.0)                         | 75.0 (63.0–82.0)                          | 0.0020*                        |
| Men                                     | 1294 (61.9)         | 309 (64.5)                           | 337 (60.7)                          | 308 (60.8)                               | 340 (61.8)                                | 0.5828                         |
| SBP, mmHg <sup>‡, §,   , #</sup>        | 135 (118–158)       | 138 (116–168)                        | 139 (120–162)                       | 135 (118–151)                            | 132 (115–151)                             | 0.0008*                        |
| Resting HR, beats/min <sup>‡, §</sup>   | 90 (72–110)         | 95 (75–118)                          | 90 (74–110)                         | 87 (70–107)                              | 90 (72–109)                               | 0.0044*                        |
| §                                       |                     |                                      |                                     |                                          |                                           |                                |
| CKD                                     | 1318 (63.0)         | 324 (67.6)                           | 357 (64.3)                          | 309 (61.0)                               | 328 (59.6)                                | 0.0389                         |
| Ischemic etiology <sup>‡, §,   </sup>   | 594 (28.4)          | 161 (33.6)                           | 173 (31.1)                          | 117 (23.1)                               | 143 (26.0)                                | 0.0007*                        |
| <b>Laboratory findings</b>              |                     |                                      |                                     |                                          |                                           |                                |
| Hemoglobin, g/dL <sup>†, ‡, §,   </sup> | 12.4 (10.9–13.9)    | 13.4 (12.1–14.9)                     | 12.3 (10.9–13.7)                    | 12.2 (10.6–13.5)                         | 11.8 (10.4–13.4)                          | <0.0001*                       |
| Creatinine, mg/dL                       | 1.00 (0.77–1.30)    | 1.03 (0.80–1.34)                     | 1.00 (0.80–1.33)                    | 0.96 (0.76–1.30)                         | 0.94 (0.73–1.24)                          | 0.0040*                        |
| BUN <sup>§</sup> , mg/dL                | 20.8 (16.0–28.3)    | 21.9 (16.6–30.2)                     | 21.7 (16.4–29.0)                    | 20.8 (16.1–27.6)                         | 19.3 (14.7–26.5)                          | 0.0001*                        |
| BUN/creatinine ratio                    | 20.7 (16.8–26.1)    | 20.6 (16.3–27.0)                     | 21.0 (17.1–25.8)                    | 20.7 (17.0–25.8)                         | 20.3 (16.6–26.2)                          | 0.5556                         |
| Sodium, mEq/L <sup>‡, §</sup>           | 140.0 (138.0–142.0) | 139.6 (137.0–142.0)                  | 140.0 (137.0–142.0)                 | 140.0 (138.0–142.0)                      | 140.0 (138.0–142.0)                       | 0.0002*                        |
| <b>Medications</b>                      |                     |                                      |                                     |                                          |                                           |                                |
| ACEI or ARBs                            | 923 (44.5)          | 205 (42.9)                           | 271 (49.3)                          | 225 (44.9)                               | 222 (40.6)                                | 0.0293                         |
| Digoxin                                 | 173 (8.3)           | 34 (7.1)                             | 43 (7.8)                            | 44 (8.7)                                 | 52 (9.5)                                  | 0.5278                         |
| Loop diuretics                          | 909 (43.8)          | 204 (42.7)                           | 258 (47.1)                          | 222 (44.2)                               | 225 (41.2)                                | 0.2362                         |

|                      |                   |                   |                   |                   |                   |               |
|----------------------|-------------------|-------------------|-------------------|-------------------|-------------------|---------------|
| <b>Beta-blockers</b> | <b>914 (44.1)</b> | <b>189 (39.8)</b> | <b>249 (45.4)</b> | <b>234 (46.6)</b> | <b>242 (44.4)</b> | <b>0.1623</b> |
| <b>Tolvaptan</b>     | <b>23 (1.4)</b>   | <b>5 (1.3)</b>    | <b>6 (1.3)</b>    | <b>9 (2.2)</b>    | <b>3 (0.7)</b>    | <b>0.3540</b> |

Data are presented as mean  $\pm$  standard deviation or median (1<sup>st</sup>–3<sup>rd</sup> quartile) for continuous variables, and as number (percentage) for categorical variables. Inter-subcategory comparisons were performed using analysis of variance or Wilcoxon’s signed-rank test for continuous variables, and the chi-square test for categorical variables.

SBP, systolic blood pressure; HR, heart rate; CKD, chronic kidney disease; BUN, blood urea nitrogen; ACE-I, angiotensin-converting enzyme; ARB, angiotensin receptor blocker.

† $P < 0.05$  for extreme hemodilution vs. modest hemodilution, ‡ $P < 0.05$  for extreme hemodilution vs. modest hemoconcentration, § $P < 0.05$  for extreme hemodilution vs. extreme hemoconcentration, || $P < 0.05$  for modest hemodilution vs. modest hemoconcentration, # $P < 0.05$  for modest hemodilution vs. extreme hemoconcentration, \* $P < 0.05$  for modest hemoconcentration vs. extreme hemoconcentration.

**Table S1B** Baseline characteristics at discharge in the total population and four  $\Delta$ Hgb-based subcategories

|                                                      | <b>Total<br/>(n = 2090)</b> | <b>Extreme<br/>hemodilution<br/>(n = 479)</b> | <b>Modest<br/>hemodilution<br/>(n = 555)</b> | <b>Modest<br/>hemoconcentration<br/>(n = 506)</b> | <b>Extreme<br/>hemoconcentration<br/>(n = 550)</b> | <b>p value<br/>(between<br/>groups)</b> |
|------------------------------------------------------|-----------------------------|-----------------------------------------------|----------------------------------------------|---------------------------------------------------|----------------------------------------------------|-----------------------------------------|
| <b>Systolic BP, mmHg</b>                             | <b>110 (100–122)</b>        | <b>110 (100–124)</b>                          | <b>110 (98–122)</b>                          | <b>110 (100–122)</b>                              | <b>110 (100–120)</b>                               | <b>0.4218</b>                           |
| <b>Resting HR, beats/min</b>                         | <b>70 (61–78)</b>           | <b>70 (61–80)</b>                             | <b>70 (60–78)</b>                            | <b>70 (62–78)</b>                                 | <b>70 (61–80)</b>                                  | <b>0.4239</b>                           |
| <b>WRF (<math>\Delta</math>Cr &gt; 0.3)</b>          | <b>211 (10.0)</b>           | <b>55 (11.4)</b>                              | <b>64 (11.5)</b>                             | <b>43 (8.5)</b>                                   | <b>49 (8.9)</b>                                    | <b>0.2063</b>                           |
| <b>LVEF, %</b>                                       | <b>44.0 (31.0–58.0)</b>     | <b>43.0 (30.0–56.0)</b>                       | <b>42.0 (30.0–58.0)</b>                      | <b>45.0 (32.0–58.0)</b>                           | <b>45.0 (32.0–59.0)</b>                            | <b>0.0440</b>                           |
| <b>Laboratory findings</b>                           |                             |                                               |                                              |                                                   |                                                    |                                         |
| <b>Hemoglobin, g/dL<sup>†, ‡, §,   , #, **</sup></b> | <b>12.4 (10.9–13.9)</b>     | <b>11.6 (10.5–12.9)</b>                       | <b>12.0 (10.7–13.4)</b>                      | <b>12.5 (11.0–14.0)</b>                           | <b>13.3 (11.9–15.0)</b>                            | <b>&lt;0.0001*</b>                      |
| <b>Creatinine, mg/dL</b>                             | <b>1.10 (0.80–1.30)</b>     | <b>1.00 (0.76–1.91)</b>                       | <b>1.01 (0.80–1.40)</b>                      | <b>1.00 (0.80–1.30)</b>                           | <b>0.99 (1.80–1.25)</b>                            | <b>0.1735</b>                           |

|                                         |                            |                            |                            |                            |                            |                    |
|-----------------------------------------|----------------------------|----------------------------|----------------------------|----------------------------|----------------------------|--------------------|
| <b>BUN, mg/dL</b>                       | <b>22.4 (16.7–31.0)</b>    | <b>21.0 (16.0–29.6)</b>    | <b>22.9 (16.7–32.0)</b>    | <b>23.0 (16.8–31.5)</b>    | <b>22.3 (17.5–30.7)</b>    | <b>0.1628</b>      |
| <b>BUN/creatinine ratio<sup>§</sup></b> | <b>22.1 (17.5–27.3)</b>    | <b>21.9 (16.4–26.9)</b>    | <b>21.7 (17.6–26.7)</b>    | <b>22.0 (17.4–27.4)</b>    | <b>23.1 (18.4–28.7)</b>    | <b>0.0052*</b>     |
| <b>Sodium mEq/L</b>                     | <b>139.0 (137.0–141.0)</b> | <b>139.0 (137.0–141.0)</b> | <b>139.0 (137.0–141.0)</b> | <b>139.2 (137.0–141.0)</b> | <b>139.0 (137.0–141.0)</b> | <b>0.1213</b>      |
| <b>Medications</b>                      |                            |                            |                            |                            |                            |                    |
| <b>ACEI or ARBs</b>                     | <b>1,444 (69.0)</b>        | <b>327 (68.2)</b>          | <b>393 (70.8)</b>          | <b>351 (69.3)</b>          | <b>373 (67.8)</b>          | <b>0.7148</b>      |
| <b>Digoxin<sup>‡, §,   , #</sup></b>    | <b>187 (8.9)</b>           | <b>28 (5.85)</b>           | <b>34 (6.13)</b>           | <b>57 (11.2)</b>           | <b>68 (12.3)</b>           | <b>&lt;0.0001*</b> |
| <b>Loop diuretics<sup>†, ‡, §</sup></b> | <b>1,617 (77.4)</b>        | <b>338 (70.)</b>           | <b>444 (80.2)</b>          | <b>393 (77.6)</b>          | <b>442 (80.3)</b>          | <b>0.0005*</b>     |
| <b>Beta-blockers</b>                    | <b>1638 (78.4)</b>         | <b>363 (75.7)</b>          | <b>450 (81.0)</b>          | <b>396 (78.2)</b>          | <b>429 (78.1)</b>          | <b>0.2267</b>      |
| <b>Tolvaptan</b>                        | <b>51 (2.8)</b>            | <b>12 (2.9)</b>            | <b>13 (2.7)</b>            | <b>17 (3.9)</b>            | <b>9 (1.9)</b>             | <b>0.3880</b>      |

Data are presented as mean ± standard deviation or median (1<sup>st</sup>–3<sup>rd</sup> quartile) for continuous variables, and as number (percentage) for categorical variables. Inter-subcategory comparisons were performed using analysis of variance or Wilcoxon's signed-rank test for continuous variables, and the chi-square test for categorical variables.

WRF, worsening renal function; EF, ejection fraction; LVEF, left ventricular ejection fraction.

<sup>†</sup> $P < 0.05$  for extreme hemodilution vs. modest hemodilution, <sup>‡</sup> $P < 0.05$  for extreme hemodilution vs. modest hemoconcentration, <sup>§</sup> $P < 0.05$  for extreme hemodilution vs. extreme hemoconcentration, <sup>||</sup> $P < 0.05$  for modest hemodilution vs. modest hemoconcentration, <sup>#</sup> $P < 0.05$  for modest hemodilution vs. extreme hemoconcentration, <sup>\*</sup> $P < 0.05$  for modest hemoconcentration vs. extreme hemoconcentration.
