# Supplementary material for: Clinical implications of the blood urea nitrogen/creatinine ratio in heart failure and their association with haemoconcentration
Source: PubMed Central journal article supplement (PMC6989280; doi:10.1002/ehf2.12531), 2019-12-09
Supplement: EHF2-6-1274-s004.pdf [file EHF2-6-1274-s004.pdf]

**Table S2A** Univariate and multivariate Cox proportional regression analyses for predictive value of the BUN/creatinine ratio on all-cause mortality in the total acute decompensated heart failure (ADHF) population

|                               | Total population            |                            |                            |                            |
|-------------------------------|-----------------------------|----------------------------|----------------------------|----------------------------|
|                               | Model 1                     |                            |                            |                            |
|                               | Univariate analysis         |                            | Multivariate analysis      |                            |
|                               | HR [95%CI]                  | p value                    | HR [95%CI]                 | p value                    |
| <b>BUN/creatinine ratio</b>   | <b>1.016 [1.009-1.021]</b>  | <b>&lt;0.0001*</b>         | <b>1.015 [1.006-1.023]</b> | <b>0.0018*</b>             |
| Age                           | 1.048 [1.039-1.057]         | <0.0001*                   | 1.054 [1.045-1.064]        | <0.0001*                   |
| LVEF                          | 0.990 [0.984-0.996]         | 0.0020*                    | 0.974 [0.968-0.981]        | <0.0001*                   |
| Loop diuretics (dis)          | 1.455 [1.147-1.871]         | 0.0017*                    | 1.455 [1.038-1.710]        | 0.0228*                    |
| Beta-blockers (dis)           | 0.759 [0.616-0.943]         | 0.0133*                    | 0.747 [0.598-0.940]        | 0.0133*                    |
| ACE-I/ARB (dis)               | 0.603 [0.500-0.730]         | <0.0001*                   | 0.631 [0.521-0.766]        | <0.0001*                   |
|                               | Model 2                     |                            |                            |                            |
|                               | Univariate analysis         |                            | Multivariate analysis      |                            |
|                               | HR [95%CI]                  | p value                    | HR [95%CI]                 | p value                    |
|                               | <b>BUN/creatinine ratio</b> | <b>1.016 [1.009-1.021]</b> | <b>&lt;0.0001*</b>         | <b>1.015 [1.005-1.023]</b> |
| Age                           | 1.048 [1.039-1.057]         | <0.0001*                   | 1.054 [1.044-1.064]        | <0.0001*                   |
| ICM                           | 1.550 [1.278-1.874]         | <0.0001*                   | 1.300 [1.060-1.590]        | 0.0188*                    |
| Systolic BP, mmHg             | 0.991 [0.986-0.997]         | 0.0028*                    | 0.990 [0.984-0.996]        | 0.0012*                    |
| Resting heart rate, beats/min | 1.010 [1.002-1.017]         | 0.0067*                    | 1.010 [1.002-1.017]        | 0.0068*                    |

|                             |                            |                    |                            |                    |
|-----------------------------|----------------------------|--------------------|----------------------------|--------------------|
| <b>LVEF</b>                 | <b>0.990 [0.984-0.996]</b> | <b>0.0020*</b>     | <b>0.978 [0.972-0.985]</b> | <b>&lt;0.0001*</b> |
| <b>Loop diuretics (dis)</b> | <b>1.455 [1.147-1.871]</b> | <b>0.0017*</b>     | <b>1.246 [0.974-1.614]</b> | <b>0.0402*</b>     |
| <b>Beta-blockers (dis)</b>  | <b>0.759 [0.616-0.943]</b> | <b>0.0133*</b>     | <b>0.721 [0.577-0.907]</b> | <b>0.0057*</b>     |
| <b>ACE-I/ARB (dis)</b>      | <b>0.60 [0.50-0.73]</b>    | <b>&lt;0.0001*</b> | <b>0.647 [0.532-0.788]</b> | <b>&lt;0.0001*</b> |

In Model 1, in addition to the BUN/Cr ratio at discharge, we included established prognostic factors for ADHF including age, LVEF at discharge, and treatment with ACE-Is or ARBs, loop diuretics, and beta-blockers at discharge.

In Model 2, the independent variables that were significantly associated with all-cause mortality in the univariate analyses, such as the presence of an ischemic etiology (ICM), SBP, and resting HR, were included the model, in addition to the above-mentioned established predictive factors. dis, at discharge.

**Table S2B** Univariate and multivariate Cox proportional regression analyses for predictive value of the BUN/creatinine ratio on all-cause mortality in the extreme hemodilution category

|                               | Extreme hemodilution        |                            |                            |                            |
|-------------------------------|-----------------------------|----------------------------|----------------------------|----------------------------|
|                               | Model 1                     |                            |                            |                            |
|                               | Univariate analysis         |                            | Multivariate analysis      |                            |
|                               | HR [95%CI]                  | p value                    | HR [95%CI]                 | p value                    |
| <b>BUN/creatinine ratio</b>   | <b>1.029 [1.011-1.046]</b>  | <b>0.0015*</b>             | <b>1.021 [1.003-1.039]</b> | <b>0.0224*</b>             |
| Age                           | 1.040 [1.025-1.056]         | <0.0001*                   | 1.037 [1.022-1.053]        | <0.0001*                   |
| LVEF                          | 0.993 [0.982-1.004]         | 0.2614                     |                            |                            |
| Loop diuretics (dis)          | 1.575 [1.053-2.436]         | 0.0260*                    | 1.622 [1.080-2.515]        | 0.0187*                    |
| Beta-blockers (dis)           | 0.682 [0.474-0.998]         | 0.0494*                    | 0.852 [0.588-1.257]        | 0.4150                     |
| ACE-I/ARB (dis)               | 0.650 [0.460-0.928]         | 0.0182*                    | 0.676 [0.476-0.970]        | 0.0338*                    |
|                               | Model 2                     |                            |                            |                            |
|                               | Univariate analysis         |                            | Multivariate analysis      |                            |
|                               | HR [95%CI]                  | p value                    | HR [95%CI]                 | p value                    |
|                               | <b>BUN/creatinine ratio</b> | <b>1.029 [1.011-1.046]</b> | <b>0.0015*</b>             | <b>1.024 [1.004-1.042]</b> |
| Age                           | 1.040 [1.025-1.056]         | <0.0001*                   | 1.035 [1.020-1.051]        | <0.0001*                   |
| Ischemic etiology             | 1.604 [1.128-2.265]         | 0.0088*                    | 1.649 [1.130-2.394]        | 0.0096*                    |
| Systolic BP, mm Hg            | 0.987 [0.978-0.996]         | 0.0058*                    | 0.985 [0.975-0.995]        | 0.0040*                    |
| Resting heart rate, beats/min | 1.007 [0.994-1.020]         | 0.2598                     |                            |                            |

|                             |                            |                |                            |                |
|-----------------------------|----------------------------|----------------|----------------------------|----------------|
| <b>LVEF</b>                 | <b>0.993 [0.982-1.004]</b> | <b>0.2614</b>  |                            |                |
| <b>Loop diuretics (dis)</b> | <b>1.575 [1.053-2.436]</b> | <b>0.0260*</b> | <b>1.401 [0.928-2.183]</b> | <b>0.1103</b>  |
| <b>Beta-blockers (dis)</b>  | <b>0.682 [0.474-0.998]</b> | <b>0.0494*</b> | <b>0.718[0.489-1.072]</b>  | <b>0.1046</b>  |
| <b>ACE-I/ARB (dis)</b>      | <b>0.650 [0.460-0.928]</b> | <b>0.0182*</b> | <b>0.658 [0.462-0.947]</b> | <b>0.0247*</b> |

In Model 1, in addition to the BUN/Cr ratio at discharge, we included established prognostic factors for ADHF including age, LVEF at discharge, and treatment with ACE-Is or ARBs, loop diuretics, and beta-blockers at discharge.

In Model 2, the independent variables that were significantly associated with all-cause mortality in the univariate analyses, such as the presence of an ICM, SBP, and resting HR, were included the model, in addition to the above-mentioned established predictive factors.

**Table S2C** Univariate and multivariate Cox proportional regression analyses for predictive value of the BUN/creatinine ratio on all-cause mortality in the modest hemodilution category

|                                      | Modest hemodilution         |                            |                            |                            |
|--------------------------------------|-----------------------------|----------------------------|----------------------------|----------------------------|
|                                      | Model 1                     |                            |                            |                            |
|                                      | Univariate analysis         |                            | Multivariate analysis      |                            |
|                                      | HR [95%CI]                  | p value                    | HR [95%CI]                 | p value                    |
| <b>BUN/creatinine ratio</b>          | <b>1.029 [1.009-1.048]</b>  | <b>0.0047*</b>             | <b>1.015 [0.994-1.034]</b> | <b>0.1509</b>              |
| <b>Age</b>                           | <b>1.061 [1.041-1.082]</b>  | <b>&lt;0.0001*</b>         | <b>1.062 [1.042-1.084]</b> | <b>&lt;0.0001*</b>         |
| <b>LVEF</b>                          | <b>0.990 [0.978-1.001]</b>  | <b>0.0952</b>              |                            |                            |
| <b>Loop diuretics (dis)</b>          | <b>2.324 [1.358-4.338]</b>  | <b>0.0014*</b>             | <b>2.205 [1.284-4.126]</b> | <b>0.0031*</b>             |
| <b>Beta-blockers (dis)</b>           | <b>0.741[0.484-1.177]</b>   | <b>0.1973</b>              |                            |                            |
| <b>ACE-I/ARB (dis)</b>               | <b>0.506 [0.350-0.741]</b>  | <b>0.0006*</b>             | <b>0.585 [0.403-0.858]</b> | <b>0.0065*</b>             |
|                                      | Model 2                     |                            |                            |                            |
|                                      | Univariate analysis         |                            | Multivariate analysis      |                            |
|                                      | HR [95%CI]                  | p value                    | HR [95%CI]                 | p value                    |
|                                      | <b>BUN/creatinine ratio</b> | <b>1.029 [1.009-1.048]</b> | <b>0.0047*</b>             | <b>1.016 [0.994-1.036]</b> |
| <b>Age</b>                           | <b>1.061 [1.041-1.082]</b>  | <b>&lt;0.0001*</b>         | <b>1.061 [1.041-1.084]</b> | <b>&lt;0.0001*</b>         |
| <b>Ischemic etiology</b>             | <b>1.483 [1.025-2.125]</b>  | <b>0.0367*</b>             | <b>1.382 [0.939-2.014]</b> | <b>0.0990</b>              |
| <b>Systolic BP, mmHg</b>             | <b>0.992 [0.982-1.002]</b>  | <b>0.1614</b>              |                            |                            |
| <b>Resting heart rate, beats/min</b> | <b>1.014 [1.001-1.025]</b>  | <b>0.0272*</b>             | <b>1.010 [0.997-1.023]</b> | <b>0.1162</b>              |

|                             |                            |                |                            |                |
|-----------------------------|----------------------------|----------------|----------------------------|----------------|
| <b>LVEF</b>                 | <b>0.990 [0.978-1.001]</b> | <b>0.0952</b>  |                            |                |
| <b>Loop diuretics (dis)</b> | <b>2.324 [1.358-4.338]</b> | <b>0.0014*</b> | <b>2.084 [1.210-3.909]</b> | <b>0.0067*</b> |
| <b>Beta-blockers (dis)</b>  | <b>0.741 [0.484-1.177]</b> | <b>0.1973</b>  |                            |                |
| <b>ACE-I/ARB (dis)</b>      | <b>0.506 [0.350-0.741]</b> | <b>0.0006*</b> | <b>0.589 [0.404-0.868]</b> | <b>0.0079*</b> |

In Model 1, in addition to the BUN/Cr ratio at discharge, we included established prognostic factors for ADHF including age, LVEF at discharge, and treatment with ACE-Is or ARBs, loop diuretics, and beta-blockers at discharge.

In Model 2, the independent variables that were significantly associated with all-cause mortality in the univariate analyses, such as the presence of an ICM, SBP, and resting HR, were included the model, in addition to the above-mentioned established predictive factors.

**Table S2D** Univariate and multivariate Cox proportional regression analyses for predictive value of the BUN/creatinine ratio on all-cause mortality in the modest hemoconcentration category

|                                      | Modest hemoconcentration    |                            |                            |                    |
|--------------------------------------|-----------------------------|----------------------------|----------------------------|--------------------|
|                                      | Model 1                     |                            |                            |                    |
|                                      | Univariate analysis         |                            | Multivariate analysis      |                    |
|                                      | HR [95%CI]                  | p value                    | HR [95%CI]                 | p value            |
| <b>BUN/creatinine ratio</b>          | <b>1.011 [0.986-1.034]</b>  | <b>0.3720</b>              |                            |                    |
| <b>Age</b>                           | <b>1.044 [1.024-1.066]</b>  | <b>&lt;0.0001*</b>         | <b>1.044 [1.024-1.066]</b> | <b>&lt;0.0001*</b> |
| <b>LVEF</b>                          | <b>0.998 [0.985-1.011]</b>  | <b>0.8022</b>              |                            |                    |
| <b>Loop diuretics (dis)</b>          | <b>1.407 [0.872-2.391]</b>  | <b>0.1662</b>              |                            |                    |
| <b>Beta-blockers (dis)</b>           | <b>0.828 [0.540-1.309]</b>  | <b>0.4097</b>              |                            |                    |
| <b>ACE-I/ARB (dis)</b>               | <b>0.688 [0.463-1.038]</b>  | <b>0.0744</b>              |                            |                    |
|                                      | Model 2                     |                            |                            |                    |
|                                      | Univariate analysis         |                            | Multivariate analysis      |                    |
|                                      | HR [95%CI]                  | p value                    | HR [95%CI]                 | p value            |
|                                      | <b>BUN/creatinine ratio</b> | <b>1.011 [0.986-1.034]</b> | <b>0.3720</b>              |                    |
| <b>Age</b>                           | <b>1.044 [1.024-1.066]</b>  | <b>&lt;0.0001*</b>         | <b>1.043 [1.023-1.064]</b> | <b>&lt;0.0001*</b> |
| <b>Ischemic etiology</b>             | <b>1.630 [1.053-2.465]</b>  | <b>0.0288*</b>             | <b>1.450 [0.935-2.198]</b> | <b>0.0949</b>      |
| <b>Systolic BP, mmHg</b>             | <b>0.998 [0.986-1.010]</b>  | <b>0.8693</b>              |                            |                    |
| <b>Resting heart rate, beats/min</b> | <b>1.005 [0.988-1.022]</b>  | <b>0.5216</b>              |                            |                    |

|                             |                            |               |
|-----------------------------|----------------------------|---------------|
| <b>LVEF</b>                 | <b>0.998 [0.985-1.011]</b> | <b>0.8022</b> |
| <b>Loop diuretics (dis)</b> | <b>1.407 [0.872-2.391]</b> | <b>0.1662</b> |
| <b>Beta-blockers (dis)</b>  | <b>0.828 [0.540-1.309]</b> | <b>0.4097</b> |
| <b>ACE-I/ARB (dis)</b>      | <b>0.688 [0.463-1.038]</b> | <b>0.0744</b> |

---

In Model 1, in addition to the BUN/Cr ratio at discharge, we included established prognostic factors for ADHF including age, LVEF at discharge, and treatment with ACE-Is or ARBs, loop diuretics, and beta-blockers at discharge.

In Model 2, the independent variables that were significantly associated with all-cause mortality in the univariate analyses, such as the presence of an ICM, SBP, and resting HR, were included the model, in addition to the above-mentioned established predictive factors.



**Table S2E.** Univariate and multivariate Cox proportional regression analyses for predictive value of the BUN/creatinine ratio on all-cause mortality in the extreme hemoconcentration category

|                             | Extreme hemoconcentration   |                     |                       |                     |
|-----------------------------|-----------------------------|---------------------|-----------------------|---------------------|
|                             | Model 1                     |                     |                       |                     |
|                             | Univariate analysis         |                     | Multivariate analysis |                     |
|                             | HR [95%CI]                  | p value             | HR [95%CI]            | p value             |
| <b>BUN/creatinine ratio</b> | 1.015 [1.004-1.022]         | 0.0108*             | 1.021 [1.007-1.032]   | 0.0067*             |
| Age                         | 1.053 [1.034-1.073]         | <0.0001*            | 1.068 [1.046-1.091]   | <0.0001*            |
| LVEF                        | 0.982 [0.968-0.995]         | 0.0081*             | 0.960 [0.946-0.974]   | <0.0001*            |
| Loop diuretics (dis)        | 0.998 [0.611-1.722]         | 0.9964              |                       |                     |
| Beta-blockers (dis)         | 0.865 [0.546-1.428]         | 0.5596              |                       |                     |
| ACE-I/ARB (dis)             | 0.528 [0.353-0.793]         | 0.0023*             | 0.521 [0.345-0.790]   | 0.0023*             |
|                             | Model 2                     |                     |                       |                     |
|                             | Univariate analysis         |                     | Multivariate analysis |                     |
|                             | HR [95%CI]                  | p value             | HR [95%CI]            | p value             |
|                             | <b>BUN/creatinine ratio</b> | 1.015 [1.004-1.022] | 0.0108*               | 1.021 [1.007-1.032] |
| Age                         | 1.053 [1.034-1.073]         | <0.0001*            | 1.068 [1.046-1.091]   | <0.0001*            |
| Ischemic etiology           | 1.370 [0.888-2.076]         | 0.1510              |                       |                     |
| Systolic BP, mmHg           | 0.990 [0.977-1.002]         | 0.1143              |                       |                     |

|                                      |                            |                |                            |                    |
|--------------------------------------|----------------------------|----------------|----------------------------|--------------------|
| <b>Resting heart rate, beats/min</b> | <b>1.010 [0.993-1.026]</b> | <b>0.2276</b>  |                            |                    |
| <b>LVEF</b>                          | <b>0.982 [0.968-0.995]</b> | <b>0.0081*</b> | <b>0.960 [0.946-0.974]</b> | <b>&lt;0.0001*</b> |
| <b>Loop diuretics (dis)</b>          | <b>0.998 [0.611-1.722]</b> | <b>0.9964</b>  |                            |                    |
| <b>Beta-blockers (dis)</b>           | <b>0.865 [0.546-1.428]</b> | <b>0.5596</b>  |                            |                    |
| <b>ACE-I/ARB (dis)</b>               | <b>0.528 [0.353-0.793]</b> | <b>0.0023*</b> | <b>0.521 [0.345-0.790]</b> | <b>0.0023*</b>     |

In Model 1, in addition to the BUN/Cr ratio at discharge, we included established prognostic factors for ADHF including age, LVEF at discharge, and treatment with ACE-Is or ARBs, loop diuretics, and beta-blockers at discharge.

In Model 2, the independent variables that were significantly associated with all-cause mortality in the univariate analyses, such as the presence of an ICM, SBP, and resting HR, were included the model, in addition to the above-mentioned established predictive factors.
