# Supplementary material for: Clinical implications of the blood urea nitrogen/creatinine ratio in heart failure and their association with haemoconcentration
Source: PubMed Central journal article supplement (PMC6989280; doi:10.1002/ehf2.12531), 2019-12-09
Supplement: EHF2-6-1274-s005.pdf [file EHF2-6-1274-s005.pdf]

**Table S3A.** Univariate analysis of plasma B-type natriuretic peptide (BNP) level at admission

| Hazard ratio of <u>BNP</u> on all-cause mortality in univariate analysis |                |                          |                |                     |         |                          |                |                           |         |
|--------------------------------------------------------------------------|----------------|--------------------------|----------------|---------------------|---------|--------------------------|----------------|---------------------------|---------|
| Total                                                                    |                | ΔHgb-based subcategories |                |                     |         |                          |                |                           |         |
|                                                                          |                | Extreme hemodilution     |                | Modest hemodilution |         | Modest Hemoconcentration |                | Extreme hemoconcentration |         |
| HR [95%CI]                                                               | p value        | HR [95%CI]               | p value        | HR [95%CI]          | p value | HR [95%CI]               | p value        | HR [95%CI]                | p value |
| 1.000[1.000-1.000]                                                       | <b>0.0001*</b> | 1.000[1.000-1.000]       | <b>0.0466*</b> | 1.000[0.999-1.000]  | 0.0698  | 1.000[1.000-1.000]       | <b>0.0388*</b> | 1.000[0.999-1.000]        | 0.1302  |

Note that BNP was collected in 59.9% of cases.

**Table S3B** Multivariate analysis including BNP level at admission

| Hazard ratio of BUN/Cr ratio and <u>BNP</u> on all-cause mortality in multivariate analysis |            |                        |                |                          |                |                     |         |                          |         |                           |                |
|---------------------------------------------------------------------------------------------|------------|------------------------|----------------|--------------------------|----------------|---------------------|---------|--------------------------|---------|---------------------------|----------------|
|                                                                                             |            | Total                  |                | ΔHgb-based subcategories |                |                     |         |                          |         |                           |                |
|                                                                                             |            |                        |                | Extreme hemodilution     |                | Modest hemodilution |         | Modest hemoconcentration |         | Extreme hemoconcentration |                |
|                                                                                             |            | HR [95%CI]             | p value        | HR [95%CI]               | p value        | HR [95%CI]          | p value | HR [95%CI]               | p value | HR [95%CI]                | p value        |
| Model 1                                                                                     | BUN/Cr     | 1.011[1.000-1.020]     | <b>0.0395*</b> | 1.027[1.004-1.048]       | <b>0.0184*</b> | 1.015[0.994-1.034]  | 0.1509  | NA [NA]                  | NA      | 1.021[1.007-1.032]        | <b>0.0067*</b> |
|                                                                                             | <u>BNP</u> | 1.000<br>[0.999-1.000] | 0.0866         | 1.000<br>[0.999-1.000]   | 0.3948         | NA [NA]             | NA      | 1.000<br>[0.999-         | 0.1528  | NA [NA]                   | NA             |

|         |            |                        |        |                        |         |                    |        |                        |        |                    |         |
|---------|------------|------------------------|--------|------------------------|---------|--------------------|--------|------------------------|--------|--------------------|---------|
|         |            |                        |        |                        |         |                    |        | 1.096]                 |        |                    |         |
| Model 2 | BUN/Cr     | 1.011[0.999-1.021]     | 0.0605 | 1.031[1.008-1.054]     | 0.0088* | 1.016[0.994-1.036] | 0.1323 | NA [NA]                | NA     | 1.021[1.007-1.032] | 0.0067* |
|         | <u>BNP</u> | 1.000<br>[0.999-1.000] | 0.0570 | 1.000<br>[0.999-1.000] | 0.6977  | NA [NA]            | NA     | 1.000<br>[0.999-1.001] | 0.1542 | NA [NA]            | NA      |

**Table S3C** Univariate analysis of N-terminal pro-brain natriuretic peptide (NT-proBNP) level at admission

| Hazard ratio of <u>NT-pro BNP</u> on all-cause mortality in univariate analysis |          |                          |         |                     |         |                          |         |                           |         |
|---------------------------------------------------------------------------------|----------|--------------------------|---------|---------------------|---------|--------------------------|---------|---------------------------|---------|
| Total                                                                           |          | ΔHgb-based subcategories |         |                     |         |                          |         |                           |         |
|                                                                                 |          | Extreme hemodilution     |         | Modest hemodilution |         | Modest hemoconcentration |         | Extreme hemoconcentration |         |
| HR [95%CI]                                                                      | p value  | HR [95%CI]               | p value | HR [95%CI]          | p value | HR [95%CI]               | p value | HR [95%CI]                | p value |
| 1.000[1.000-1.000]                                                              | <0.0001* | 1.000[0.999-1.000]       | 0.3343  | 1.000[1.000-1.000]  | 0.0001* | 1.000[0.999-1.000]       | 0.1059  | 1.000[1.000-1.000]        | 0.0340* |

Note that NT-ProBNP was collected in 42.3% of cases.

**Table S3D** Multivariate analysis including NT-proBNP level at admission

| Hazard ratio of BUN/Cr ratio and <u>NT-proBNP</u> on all-cause mortality in multivariate analysis |  |                          |  |  |  |  |  |  |  |
|---------------------------------------------------------------------------------------------------|--|--------------------------|--|--|--|--|--|--|--|
| Total                                                                                             |  | ΔHgb-based subcategories |  |  |  |  |  |  |  |

|         |                  |                     |         | Extreme hemodilution |         | Modest hemodilution |         | Modest hemoconcentration |         | Extreme hemoconcentration |         |
|---------|------------------|---------------------|---------|----------------------|---------|---------------------|---------|--------------------------|---------|---------------------------|---------|
|         |                  | HR [95%CI]          | p value | HR [95%CI]           | p value | HR [95%CI]          | p value | HR [95%CI]               | p value | HR [95%CI]                | p value |
| Model 1 | BUN/Cr           | 1.021[1.003-1.039]  | 0.0211* | 1.021[1.003-1.039]   | 0.0224* | 1.044[1.011-1.075]  | 0.0082* | NA [NA]                  | NA      | 1.019[0.982-1.052]        | 0.2985  |
|         | <u>NT-proBNP</u> | 1.000 [1.000-1.000] | 0.0206* | NA [NA]              | NA      | 1.000 [1.000-1.000] | 0.0004* | NA [NA]                  | NA      | 1.000 [0.999-1.000]       | 0.8353  |
| Model 2 | BUN/Cr           | 1.021[1.003-1.039]  | 0.0227* | 1.024[1.004-1.042]   | 0.0140* | 1.049[1.016-1.081]  | 0.0040* | NA [NA]                  | NA      | 1.019[0.982-1.052]        | 0.2985  |
|         | <u>NT-proBNP</u> | 1.000 [1.000-1.000] | 0.0132* | NA [NA]              | NA      | 1.000 [1.000-1.000] | 0.0019  | NA [NA]                  | NA      | 1.000 [0.999-1.000]       | 0.8353  |

Independent variables in Model 1: Age, LVEF (at discharge), ACE-Is or ARBs (at discharge), loop diuretics (at discharge), and beta-blockers (at discharge), and BUN/creatinine ratio (at discharge), plus either BNP (at admission) or NT-proBNP (at admission).

Independent variables in Model 2: In addition to variables included in Model 1, ischaemic cardiac disease, systolic blood pressure, and resting heart rate.
